# Supplementary material for: Trends and associated factors in the uptake of HIV testing among female sex workers in Sino-Vietnam border areas in Guangxi, China: a cross-sectional study
Source: Springer Nature journal article supplement (doi:10.1186/s12879-022-07459-3), 2022-05-19
Supplement: MOESM1 [file 21200170]

## Key population quantitative questionnaires

### Introduction:

Hello, We are conducting a survey mainly to investigate your awareness of health knowledge, attitude and behavior. It may involve some of your privacy, but the content of your answers will be kept strictly confidential. We only use these questionnaires to do population analyses, not to do personal analyses. We won't disclose your information to any other individuals or organizations. So we hope you answer the following questions truthfully. This investigation will take you some time. We have to say sorry for any convenience caused. Thank you for your support.

### Questionnaire based information

No.      **Questions and options**

A01      **Survey location:** \_\_\_\_\_ province (municipality) \_\_\_\_\_ city/district/county

A02      **Informed consent:** \_\_\_\_\_ (Yes/No)

A03      **Questionnaire number**      □□□□□□□□□□

(administrative division GB code + investigation object category + investigation object number)

A04      **Number of cohort surveys**      ①Baseline      ②First follow-up

A05      **Investigation date**      date: \_\_\_\_\_

A06      **Working Venue**

①sauna/bath center    ②nightclub    ③Karaoke bar/ dance halls/ pub-bar ④high-cost hotel ⑤ mid-ranking hotels ⑥rental house/client's house  
⑦foot bath salon/hair salon ⑧shop/small restaurant ⑨ street/roadside/park ⑩others (please note: \_\_\_\_\_)

A07      **The investigation site:**

①Urban area (county or city) ②Urban-rural fringe    ③ villages and towns      ④village

## Socio-demographic, behavioural and psychological questions

| No. | Questions and options                                                                                                                                                                                                                     | Answers        |
|-----|-------------------------------------------------------------------------------------------------------------------------------------------------------------------------------------------------------------------------------------------|----------------|
| B01 | <b>Your birthday?</b> ___ year ___ month ___ day                                                                                                                                                                                          |                |
| B02 | <b>Your marital status?</b> ① unmarried    ② married    ③ cohabit    ④ divorced or widowed                                                                                                                                                |                |
| B03 | <b>You registered residence?</b> ① local province<br>② outside Guangxi province (please note: _____)<br>③ other country ( please note: _____ country )                                                                                    |                |
| B04 | <b>Your nationality?</b>                                                                                                                                                                                                                  |                |
| B05 | <b>What is your degree of education?</b><br>① Illiteracy or semi-literate ② Primary school    ③ Middle school ④ High school/ technical secondary school/ vocational high school<br>⑤ Junior college and above ⑥ Graduate degree and above |                |
| B06 | <b>How long have you ever been working in this county or city ?</b><br>① >=12 months    ② 6 -11 months    ③ 1-6 months    ④ 1<months                                                                                                      |                |
| B07 | <b>Where were your last working place ?</b><br>① Outside province    ② Local province but outside this city    ③ Local city    ④ None                                                                                                     |                |
| B08 | <b>How many months have you been doing this work (commercial sexual service ) in total?</b>                                                                                                                                               | _____ month(s) |
| B09 | <b>How many months do you usually do this work in a city (or county) ?</b>                                                                                                                                                                | _____ month(s) |

| <b>HIV/AIDS knowledge</b>               |                                                                                                                                                                   |                |
|-----------------------------------------|-------------------------------------------------------------------------------------------------------------------------------------------------------------------|----------------|
| C01                                     | <b>Is AIDS a serious infectious disease with no cure?</b> ①Yes ②No ③ I don't know                                                                                 |                |
| C02                                     | <b>Is sexual transmission the main mode of HIV transmission in China?</b><br>①Yes ②No ③ I don't know                                                              |                |
| C03                                     | <b>Can you tell if someone is infected HIV from the appearance of their genitals?</b> ①Yes ②No ③ I don't know                                                     |                |
| C04                                     | <b>Does it increase the risk of HIV infection if someone has a sexually transmitted disease?</b> ①Yes ②No ③ I don't know                                          |                |
| C05                                     | <b>Can condom use reduce the risk of infecting and transmitting HIV?</b> ①Yes ②No ③ I don't know                                                                  |                |
| C06                                     | <b>Does new type of drug use (such as methamphetamine, ecstasy, ketamine, etc.) increase the risk of HIV infection?</b><br>①Yes ②No ③ I don't know                |                |
| C07                                     | <b>Should someone actively seek HIV testing and counseling after high risk behaviors (needle sharing, drug use, unsafe sex, etc.)?</b><br>①Yes ②No ③ I don't know |                |
| C8                                      | <b>Is there legal liability for intentionally spreading HIV?</b> ①Yes ②No ③ I don't know                                                                          |                |
| <b>Sexual behaviour characteristics</b> |                                                                                                                                                                   |                |
| D01                                     | <b>How old were you when you first started sexual life ?</b>                                                                                                      | _____years old |
| D02                                     | <b>How old were you when you first engaged in commercial sex ?</b>                                                                                                | _____years old |
| D03                                     | <b>Did your clients use condom in the last commercial sex ?</b> ①Yes ②No                                                                                          |                |

|        |                                                                                                                                                                                                                                                                                                                           |                                                           |
|--------|---------------------------------------------------------------------------------------------------------------------------------------------------------------------------------------------------------------------------------------------------------------------------------------------------------------------------|-----------------------------------------------------------|
| D04    | <b>Last a month, how often do your clients use condoms ?</b> ①Never                      ②Sometimes                      ③Every time                                                                                                                                                                                      |                                                           |
| D05    | <b>How many clients did you serve on the last working day ?</b>                                                                                                                                                                                                                                                           | _____ individual(s)                                       |
| D05-01 | <b>How many regular commercial sexual partners among them ?</b>                                                                                                                                                                                                                                                           | _____ individual(s)                                       |
| D06    | <b>How many clients did you serve last week ?</b>                                                                                                                                                                                                                                                                         | _____ individual(s)                                       |
| D06-01 | <b>How many regular commercial sexual partners among them ?</b>                                                                                                                                                                                                                                                           | _____ individual(s)                                       |
| D07    | <b>How many clients did you serve last month ?</b>                                                                                                                                                                                                                                                                        | _____ individual(s)                                       |
| D07-01 | <b>How many regular commercial sexual partners among them ?</b>                                                                                                                                                                                                                                                           | _____ individual(s)                                       |
| D08    | <b>How much do you charge for a commercial sex in average ?</b>                                                                                                                                                                                                                                                           | _____ RMB(Yuan)                                           |
| D09    | <b>How much do you charge for a commercial sexual behavior without condom?</b> (If never, please note “No” )                                                                                                                                                                                                              | ①_____ RMB(Yuan)<br>② No                                  |
| D10    | <b>How much do you charge for a commercial sex with condom?</b>                                                                                                                                                                                                                                                           | _____ RMB(Yuan)                                           |
| D11    | <b>How much is your annual income working as a female sex worker ?</b>                                                                                                                                                                                                                                                    | _____ RMB(Yuan)                                           |
| D12    | <b>In the past six month, how did you look for clients?</b> (multiple choices)<br>① In a fixed venues (including saunas place, nightclubs, bars, hotels, hair salons, roadside shops, etc.)<br>② Telephone appointment or door-to-door service                      ③ Internet (including QQ, Wechat, Momo, website,etc.) | Choices: _____,<br>Main choices: _____<br>(simple choice) |
| D13    | <b>What’s the average age of your male clients?</b><br>① under 29                      ②30-49 years old                      ③over 50 year old                                                                                                                                                                            |                                                           |

|                                                                                               |                                                                                                                                                                                                                     |  |
|-----------------------------------------------------------------------------------------------|---------------------------------------------------------------------------------------------------------------------------------------------------------------------------------------------------------------------|--|
| D14                                                                                           | <b>Whether your clients have taken aphrodisiacs before you served them ?</b><br>①No (Skip to D17) ②sometimes ③Usually                                                                                               |  |
| D15                                                                                           | <b>What are the age of the clients who use aphrodisiacs (or use other aphrodisiac tool)? (multiple choices)</b><br>①Under 40 ②40-50 years old ③50-60 years old ④60-70 years ⑤more than 70 years old ⑥unknown        |  |
| D16                                                                                           | <b>Did you think it was effective after they use aphrodisiacs?</b> ①No ②Yes ③Unknown                                                                                                                                |  |
| D17                                                                                           | <b>Do you have a regular, non-commercial sexual partners?</b> ①Yes, _____individual(s) ② No (Skip to E01)                                                                                                           |  |
| D18-01                                                                                        | <b>Where are your non-commercial sexual partners come from?_____</b> (County or viliage)                                                                                                                            |  |
| D18-02                                                                                        | <b>How many times does he look for you in a month?</b><br>① less than once a month ② once or twice a month ③ 3-5 times a month<br>④ more than 5 but less than 9 times a month ⑤ more than 10 times a month          |  |
| <b>Following questions only ask if participant was married or cohabiting with a boyfriend</b> |                                                                                                                                                                                                                     |  |
| E01                                                                                           | <b>How often have you sex with your spouse or boyfriend ?</b> ①more than one time a week ② less than one time a week ③never                                                                                         |  |
| E02                                                                                           | <b>How often do your spouse or boyfriend use condom when you have sex with him ?</b> ①never ② sometime ③every time                                                                                                  |  |
| <b>HIV-risk behaviour</b>                                                                     |                                                                                                                                                                                                                     |  |
| F01                                                                                           | <b>Do you use any illicit drug? Or have you ever used illicit drug ? (Including heroin, cocaine, opium, marijuana, morphine, methamphetamine, doloretine, K powder (ketamine), ecstasy, and cannabis )</b> ①Yes ②No |  |
| F02                                                                                           | <b>Do you inject illicit drug? Or have you ever injected illicit drug ?</b> ①Yes ②No                                                                                                                                |  |
| F03                                                                                           | <b>How many times did you inject illicit drug a day in average ? _____</b> times                                                                                                                                    |  |

|                                     |                                                                                                                                                                                                                          |  |
|-------------------------------------|--------------------------------------------------------------------------------------------------------------------------------------------------------------------------------------------------------------------------|--|
| F04                                 | <b>Did you share needles with others when you inject illicit drug ?</b> ①Yes ②No                                                                                                                                         |  |
| F05                                 | <b>How often did you share needles with others when you inject illicit drug in the past six months?</b><br>①Never ②Sometime ③Every time                                                                                  |  |
| <b>Psychological variables</b>      |                                                                                                                                                                                                                          |  |
| G01                                 | <b>Do you perceive the risk of HIV infection as a female sex worker ?</b><br>①very likely ②likely ③unlikely ④very unlikely                                                                                               |  |
| G02                                 | <b>Do you perceive the vulnerability of HIV/STI infection as a female sex worker ?</b><br>①very likely ②likely ③unlikely ④very unlikely                                                                                  |  |
| G03                                 | <b>What are you fear of as a female sex worker ? (multiple optional)</b><br>① infected HIV ②infected STIs ③ Clients don't give money<br>④ Police arrest ⑤Families or acquaintances know my work ⑥ Others                 |  |
| <b>HIV testing ( self-reported)</b> |                                                                                                                                                                                                                          |  |
| H01                                 | <b>Have you been diagnosed with a sexually transmitted disease in the past year?</b> ①Yes ②No (Skip to H03)                                                                                                              |  |
| H02                                 | <b>What kinds of STDs have you been diagnosed with in the past year? (Multiple options)</b><br>①gonorrhea ②syphilis ③Genital tract Chlamydia trachomatis infection ④condyloma acuminatum<br>⑤genital herpes ⑥Others_____ |  |
| H03                                 | <b>Have you ever taken a HIV test (blood donations not included) in the preceding year ?</b> ①Yes ②No (Skip to J01)                                                                                                      |  |
| H04                                 | <b>What's the date of the HIV test in the preceding year ?</b> _____year_____month_____day                                                                                                                               |  |
| H05                                 | <b>Where did you take the HIV test in the preceding year ?</b> ①Local area ②Other places_____                                                                                                                            |  |

|                                                                                                                                                                                                                                                                    |                                                                                                                                                                |             |
|--------------------------------------------------------------------------------------------------------------------------------------------------------------------------------------------------------------------------------------------------------------------|----------------------------------------------------------------------------------------------------------------------------------------------------------------|-------------|
| H06                                                                                                                                                                                                                                                                | What's the result of the HIV test in the preceding year ?    ①Negative            ②Positive            ③ I don't know                                          |             |
| <b>HIV-related services</b>                                                                                                                                                                                                                                        |                                                                                                                                                                |             |
| I01                                                                                                                                                                                                                                                                | Have you ever received free AIDS education and condom distribution services in the past year ? ①Yes            ②No                                             |             |
| I02                                                                                                                                                                                                                                                                | Have you ever received free illicit drug maintenance therapy or clean needles provided by community or the local CDC in the past year ?    ①Yes            ②No |             |
| I03                                                                                                                                                                                                                                                                | Have you ever received peer education services from the local CDC in the past year ?    ①Yes            ②No                                                    |             |
| <b>This the end of the investigation. Thank you for your cooperation. To understand your sexual health, we would like to collect your 5ml blood for HIV, syphilis and hepatitis C test. The test is free for you, and we will tell you the result of the test.</b> |                                                                                                                                                                |             |
| J01                                                                                                                                                                                                                                                                | Would you like to donate blood and be tested for sexual transmitted disease after the investigation ?    ①Yes            ②No                                   |             |
| J02a                                                                                                                                                                                                                                                               | Have you ever tested positive for HIV before ?    ①Yes            ②No (Skip to J03)                                                                            |             |
| J02b                                                                                                                                                                                                                                                               | If yes, what was the earliest date of the positive test ?                                                                                                      | Date: _____ |
| <b>The following questions should be filled out by the investigator based on the test results.</b>                                                                                                                                                                 |                                                                                                                                                                |             |
| J03                                                                                                                                                                                                                                                                | <b>HIV antibody test results</b>                                                                                                                               |             |
|                                                                                                                                                                                                                                                                    | <b>First ELISA screening</b> ①Positive            ②Negative                                                                                                    |             |
|                                                                                                                                                                                                                                                                    | <b>Second ELISA recheck</b> ①Positive            ②Negative                                                                                                     |             |
|                                                                                                                                                                                                                                                                    | <b>Confirmed test</b> ①Positive            ②Negative            ③Suspicious            ④No detected                                                            |             |
| J04                                                                                                                                                                                                                                                                | <b>Syphilis test result</b>                                                                                                                                    |             |

|     |                              |           |           |  |
|-----|------------------------------|-----------|-----------|--|
|     | <b>ELISA screening</b>       | ①Positive | ②Negative |  |
|     | <b>RPR/TRUST detection</b>   | ①Positive | ②Negative |  |
| J05 | <b>HCV test result</b>       |           |           |  |
|     | <b>First ELISA screening</b> | ①Positive | ②Negative |  |
|     | <b>Second ELISA re-test</b>  | ①Positive | ②Negative |  |

### The questionnaire quality control table

| Item                                    | Completion situation |    | Note |
|-----------------------------------------|----------------------|----|------|
|                                         | Yes                  | No |      |
| Specification, clear                    |                      |    |      |
| All questions were answered, no leakage |                      |    |      |
| No logical errors                       |                      |    |      |

Note: Please put “√” in accord with the options

Investigator sign: \_\_\_\_\_

Investigation date: \_\_\_\_\_

Quality control supervisor sign: \_\_\_\_\_

Date: \_\_\_\_\_
